# Supplementary material for: Design, synthesis and biological evaluation of hydrogen sulfide releasing derivatives of 3-n-butylphthalide as potential antiplatelet and antithrombotic agents
Source: Royal Society of Chemistry journal article supplement (doi:10.1039/c4ob00830h), 2014-01-01

Supporting Information

**Design, synthesis and biological evaluation of hydrogen sulfide releasing  
derivatives of 3-*n*-butylphthalide as potential antiplatelet and antithrombotic  
agents**

*Xiaoli Wang, Linna Wang, Xiao Sheng<sup>#</sup>, Zhangjian Huang, Tingting Li, Ming Zhang, Jinyi Xu,  
Hui Ji\*, Jian Yin\* and Yihua Zhang\**

**Table of contents:**

|                                       |        |
|---------------------------------------|--------|
| 1. Table of compound purity by HPLC   | S2-S3  |
| 2. The spectral data of new compounds | S4-S12 |

## 1. HPLC assessment of compound purity

Target compounds **8a–g** and **9a–f** with a purity of > 95% (HPLC analysis) were used for subsequent experiments. We provided the spectra of HPLC assays as below.

Column: Inertex C<sub>18</sub> (150mm×4.6mm×5μm);

Mobile phase: methanol : H<sub>2</sub>O = 90 : 10;

Wavelength: 254 nm;

Rate: 1 mL/min;

Temperature: 25 °C

**8a**, 97.6%

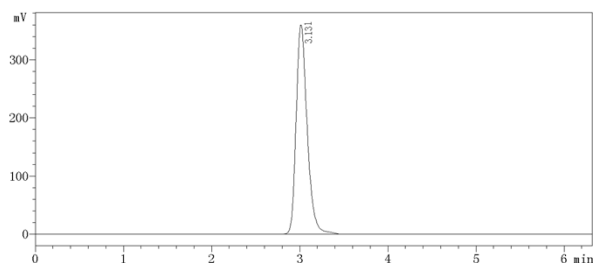

**8b**, 97.9%

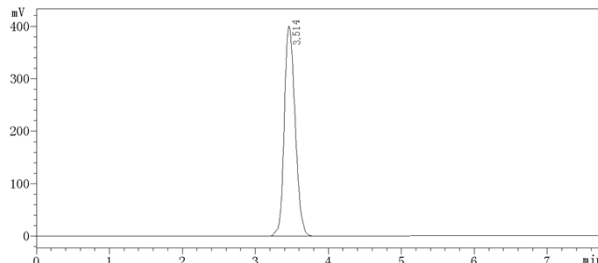

**8c**, 97.2%

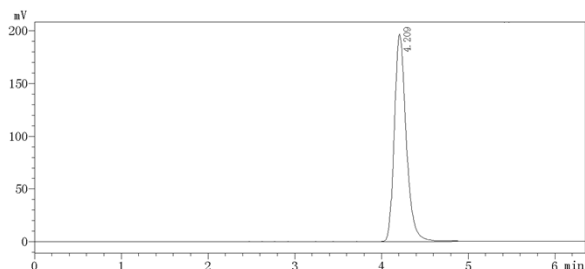

**8d**, 98.3%

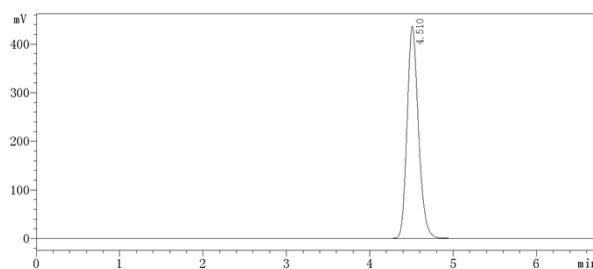

**8e**, 97.8%

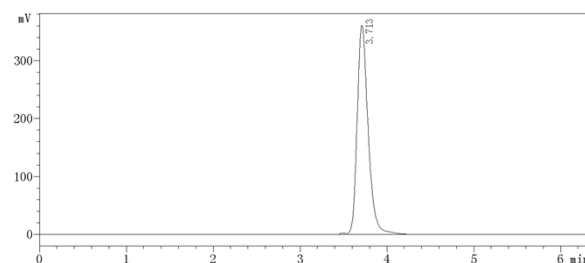

**8f**, 98.2%

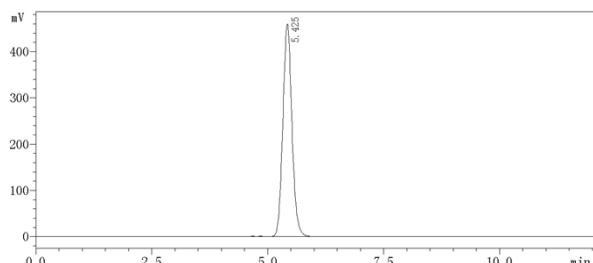

**8g**, 96.5%

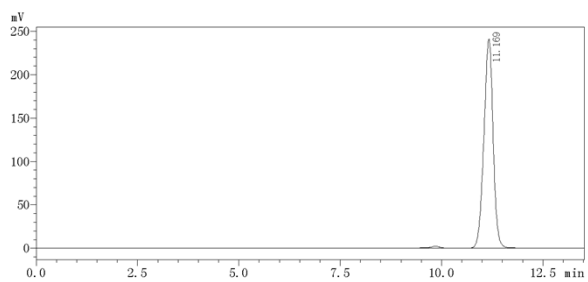

**9a, 97.7%**

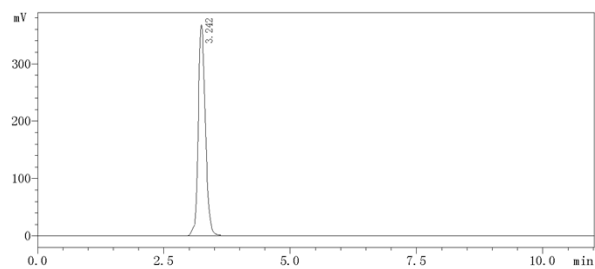

**9b, 97.3%**

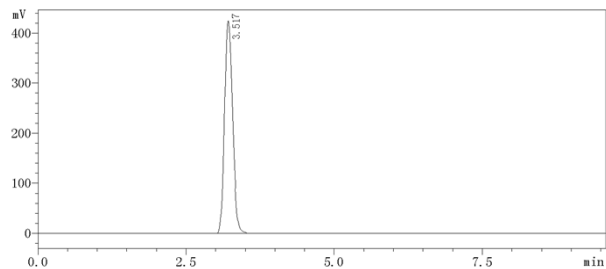

**9c, 97.8%**

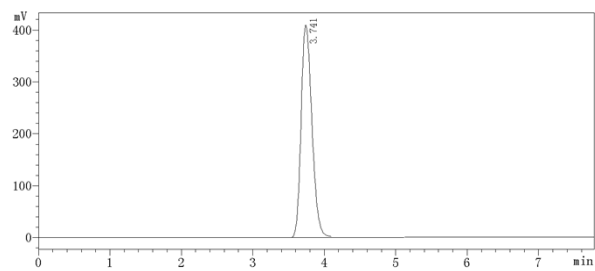

**9d, 97.0%**

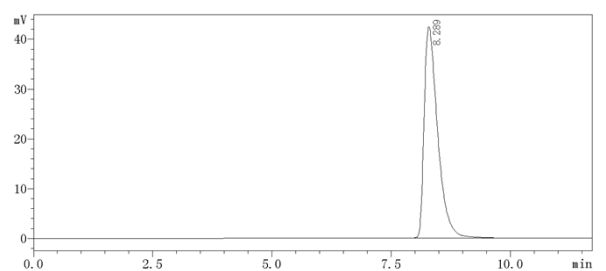

**9e, 98.5%**

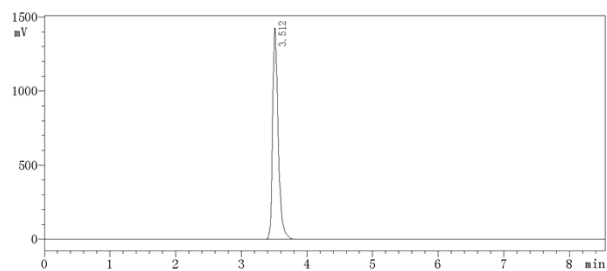

**9f, 98.2%**

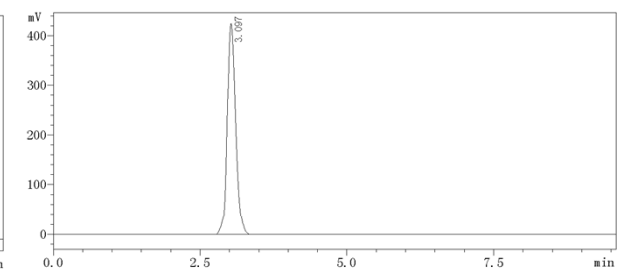

## 2. The spectral data of new compounds

### 8a

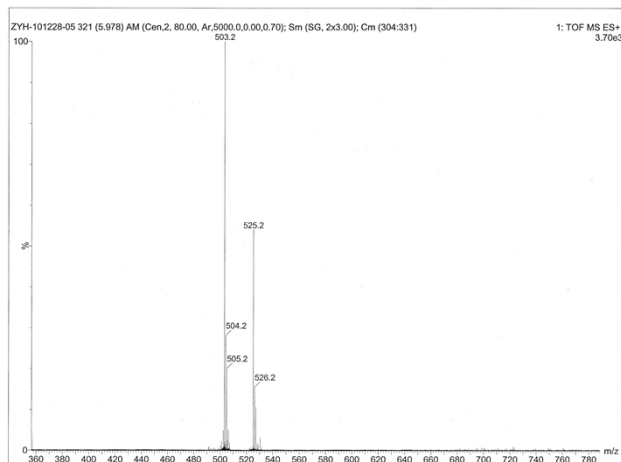

#### Elemental Composition Report

Single Mass Analysis  
Tolerance = 5.0 PPM / DBE: min = -1.5, max = 20.0  
Selected filters: None

Monoisotopic Mass, Even Electron Ions  
1619 formula(e) evaluated with 2 results within limits (up to 50 best isotopic matches for each mass)

Elements Used:  
C: 0-50 H: 0-100 N: 0-3 O: 0-8 S: 0-3 Na: 0-1

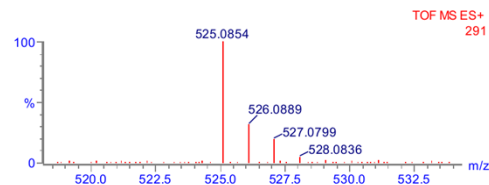

| Minimum: | 5.0        | 5.0  | -1.5 |      |       |                  |  |
|----------|------------|------|------|------|-------|------------------|--|
| Maximum: | 20.0       | 20.0 | 20.0 |      |       |                  |  |
| Mass     | Calc. Mass | mDa  | PPM  | DBE  | i-FIT | Formula          |  |
| 525.0854 | 525.0840   | 1.4  | 2.7  | 12.5 | 0.0   | C25 H26 O5 S3 Na |  |
|          | 525.0864   | -1.0 | -1.9 | 15.5 | 0.1   | C27 H25 O5 S3    |  |

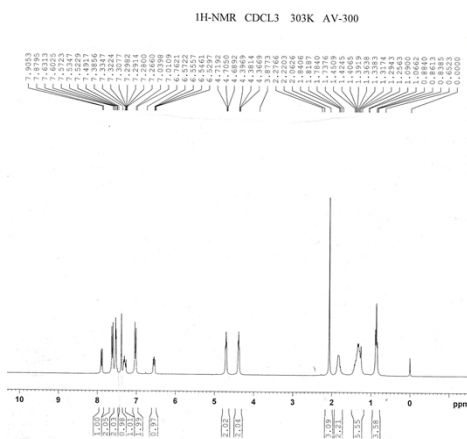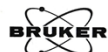

Current Data Parameters  
NAME: 8a  
PROCNO: 1  
F2 - Acquisition Parameters  
Date\_: 20121229  
Time\_: 18:47  
INSTRUM: spect  
PROBHD: 5 mm QNP 1H/13  
PULPROG: zgpg30  
TD: 65536  
SOLVENT: CDCl3  
NS: 180  
DS: 4  
SWH: 19511.250 Hz  
FIDRES: 0.594046 Hz  
AQ: 0.19000000 sec  
RG: 320  
DQ: 0.20000000 sec  
TE: 300.2 K  
T1: 2.00000000 sec  
T2: 0.03000000 sec  
T2RHO: 1.410200  
MVIC: 130  
PC: 1.00  
SFO: 101.625310 MHz  
SPFO: 300.1312000 MHz  
F1 - Processing parameters  
SI: 32768  
SF: 300.1312000 MHz  
WDW: EM  
SSB: 0  
LB: 0.20 Hz  
GB: 0  
PC: 1.00

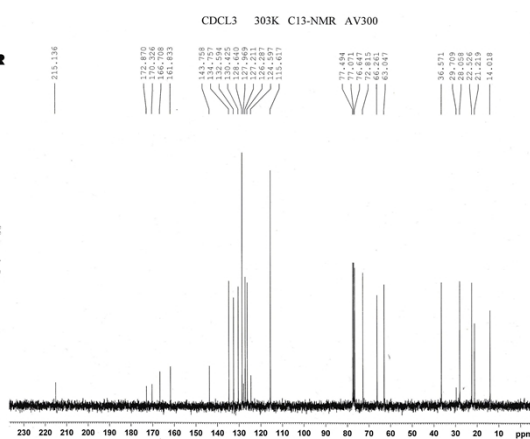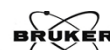

Current Data Parameters  
NAME: 8a  
PROCNO: 1  
F2 - Acquisition Parameters  
Date\_: 20121229  
Time\_: 18:47  
INSTRUM: spect  
PROBHD: 5 mm QNP 1H/13  
PULPROG: zgpg30  
TD: 65536  
SOLVENT: CDCl3  
NS: 180  
DS: 4  
SWH: 19511.250 Hz  
FIDRES: 0.594046 Hz  
AQ: 0.19000000 sec  
RG: 320  
DQ: 0.20000000 sec  
TE: 300.2 K  
T1: 2.00000000 sec  
T2: 0.03000000 sec  
T2RHO: 1.410200  
MVIC: 130  
PC: 1.00  
SFO: 101.625310 MHz  
SPFO: 300.1312000 MHz  
F1 - Processing parameters  
SI: 32768  
SF: 300.1312000 MHz  
WDW: EM  
SSB: 0  
LB: 0.20 Hz  
GB: 0  
PC: 1.00

### 8b

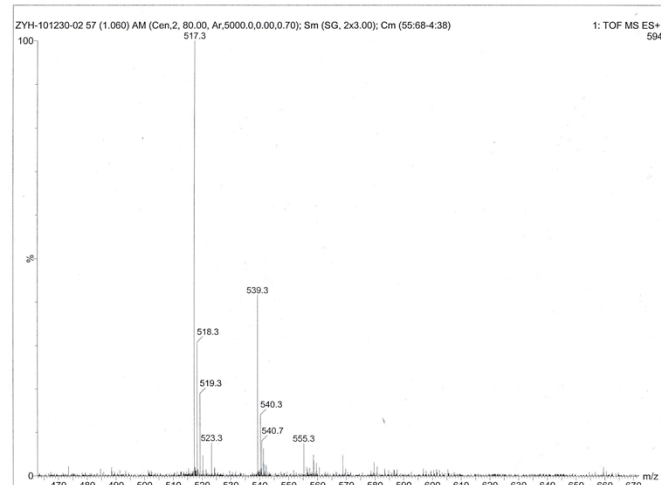

#### Elemental Composition Report

Single Mass Analysis  
Tolerance = 5.0 PPM / DBE: min = -1.5, max = 20.0  
Selected filters: None

Monoisotopic Mass, Even Electron Ions  
1667 formula(e) evaluated with 2 results within limits (up to 50 best isotopic matches for each mass)

Elements Used:  
C: 0-50 H: 0-100 N: 0-3 O: 0-8 Na: 0-1 S: 0-3

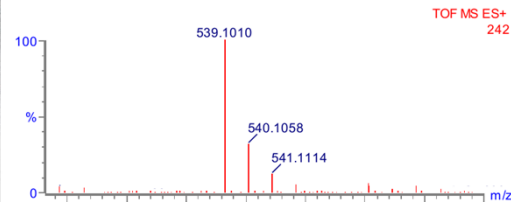

| Minimum: | 5.0        | 5.0  | -1.5 |      |       |                  |  |
|----------|------------|------|------|------|-------|------------------|--|
| Maximum: | 20.0       | 20.0 | 20.0 |      |       |                  |  |
| Mass     | Calc. Mass | mDa  | PPM  | DBE  | i-FIT | Formula          |  |
| 539.1010 | 539.0997   | 1.3  | 2.4  | 12.5 | 4.6   | C26 H28 O5 Na S3 |  |
|          | 539.1021   | -1.1 | -2.0 | 15.5 | 5.2   | C28 H27 O5 S3    |  |

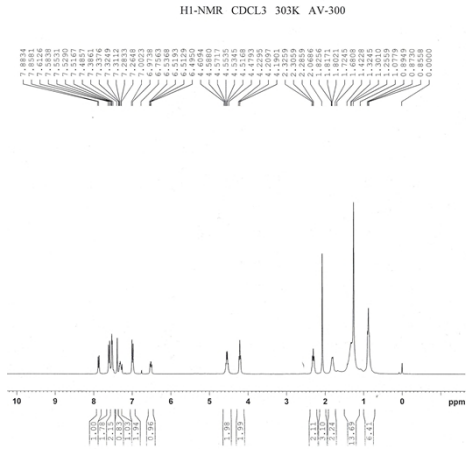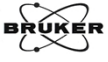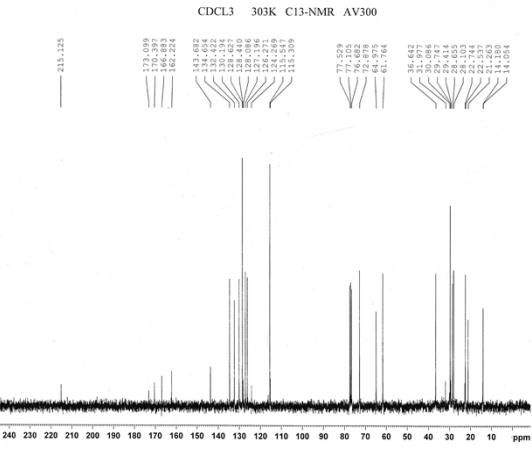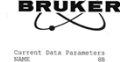

8c

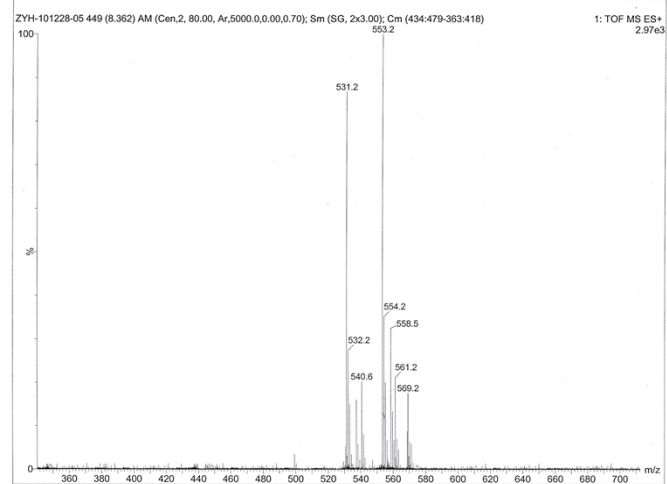

Elemental Composition Report

Single Mass Analysis  
Tolerance = 5.0 PPM / DBE: min = -1.5, max = 20.0  
Selected filters: None

Monoisotopic Mass, Even Electron Ions  
1715 formula(e) evaluated with 2 results within limits (up to 50 best isotopic matches for each mass)

Elements Used:  
C: 0-50 H: 0-100 N: 0-3 O: 0-8 Na: 0-1 S: 0-3

TOF MS ES+  
585

| Minimum Mass | Calc. Mass | mDa  | PPM  | DBE  | i-FIT | Formula          |
|--------------|------------|------|------|------|-------|------------------|
| 553.1167     | 553.1177   | -1.0 | -1.8 | 15.5 | 0.5   | C29 H29 O5 S3    |
|              | 553.1153   | 1.4  | 2.5  | 12.5 | 0.5   | C27 H30 O5 Na S3 |

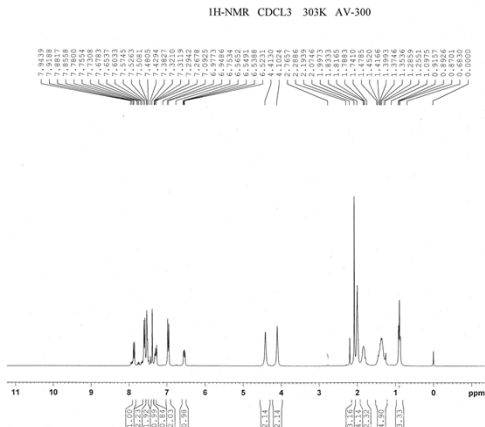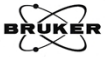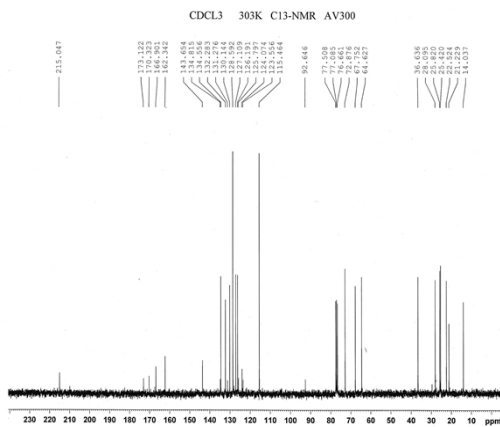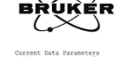

8d

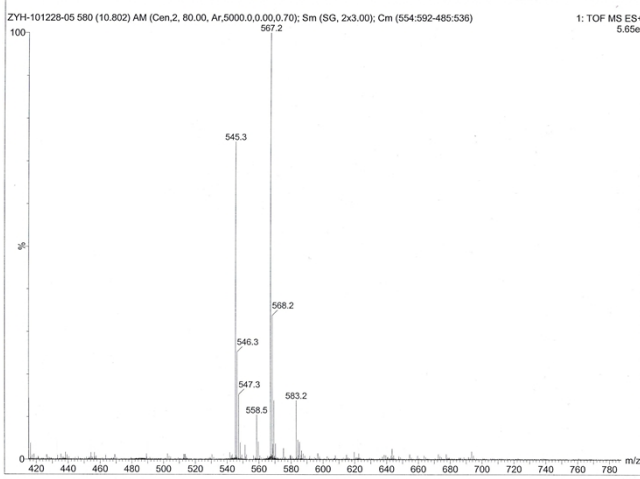

**Elemental Composition Report**

**Single Mass Analysis**  
 Tolerance = 5.0 PPM / DBE: min = -1.5, max = 20.0  
 Selected filters: None

**Monoisotopic Mass, Even Electron Ions**  
 1763 formula(e) evaluated with 2 results within limits (up to 50 best isotopic matches for each mass)

**Elements Used:**  
 C: 0-50 H: 0-100 N: 0-3 O: 0-8 Na: 0-1 S: 0-3

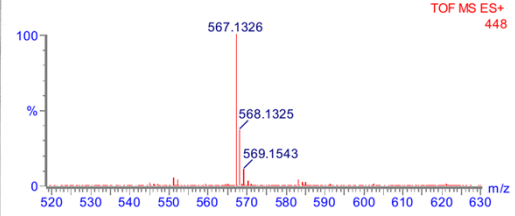

| Minimum: | Maximum: | Calc. Mass | mDa  | PPM  | DBE  | i-FIT | Formula          |
|----------|----------|------------|------|------|------|-------|------------------|
| 567.1326 | 567.1310 | 5.0        | 1.6  | 2.8  | 12.5 | 16.2  | C28 H32 O5 Na S3 |
|          | 567.1334 | -0.8       | -1.4 | 15.5 | 17.3 |       | C30 H31 O5 S3    |

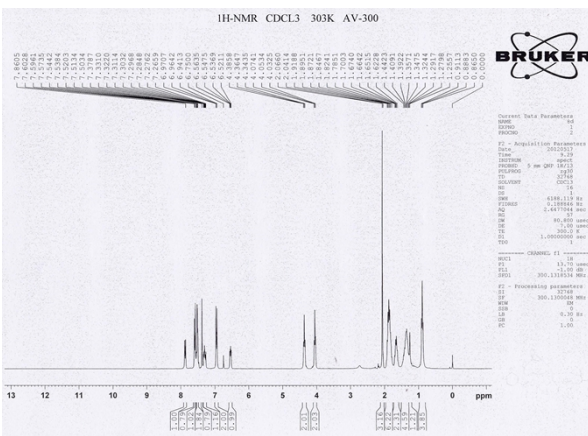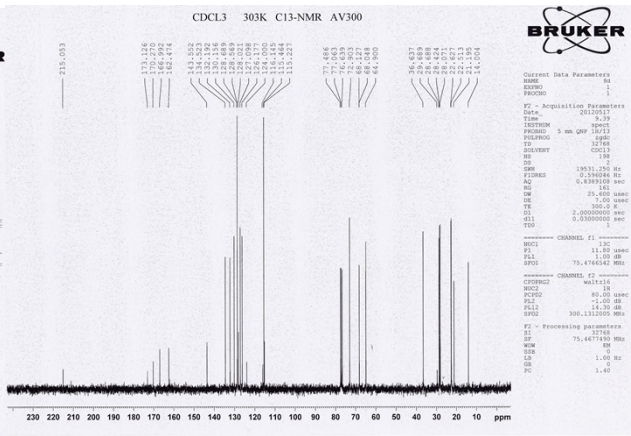

8e

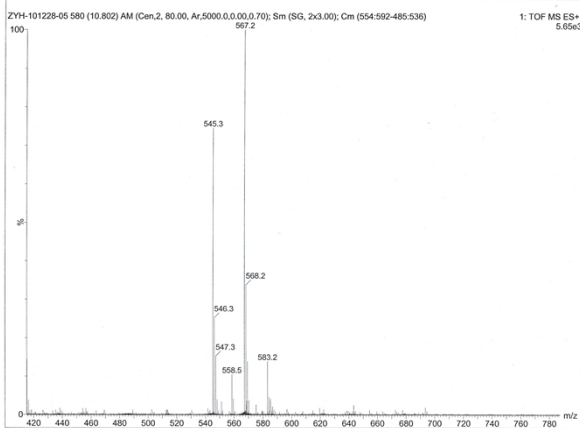

**Elemental Composition Report**

**Single Mass Analysis**  
 Tolerance = 5.0 PPM / DBE: min = -1.5, max = 20.0  
 Selected filters: None

**Monoisotopic Mass, Even Electron Ions**  
 274 formula(e) evaluated with 3 results within limits (up to 50 closest results for each mass)

**Elements Used:**  
 C: 0-50 H: 0-100 O: 0-10 S: 0-3

8e  
 ZYH-120419-03 78 (1.453)

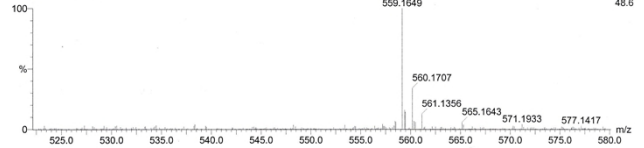

| Minimum: | Maximum: | Calc. Mass | mDa  | PPM  | DBE | i-FIT | Formula        |
|----------|----------|------------|------|------|-----|-------|----------------|
| 559.1649 | 559.1647 | 0.2        | 0.4  | 12.5 | 1.0 |       | C29 H35 O5 S3  |
|          | 559.1638 | 1.1        | 2.0  | 13.5 | 0.1 |       | C28 H31 O10 S  |
|          | 559.1672 | -2.3       | -4.1 | 8.5  | 0.3 |       | C25 H35 O10 S2 |

Page 1

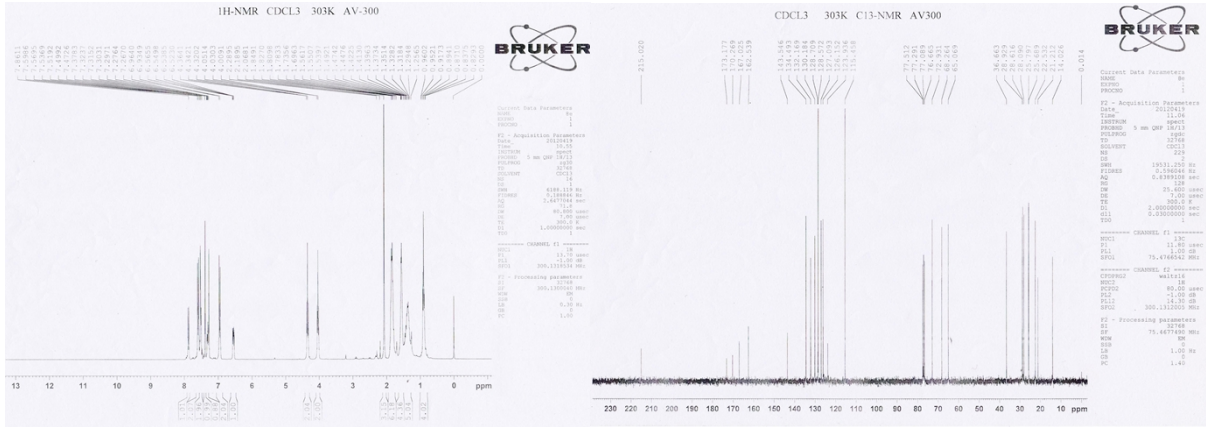

8f

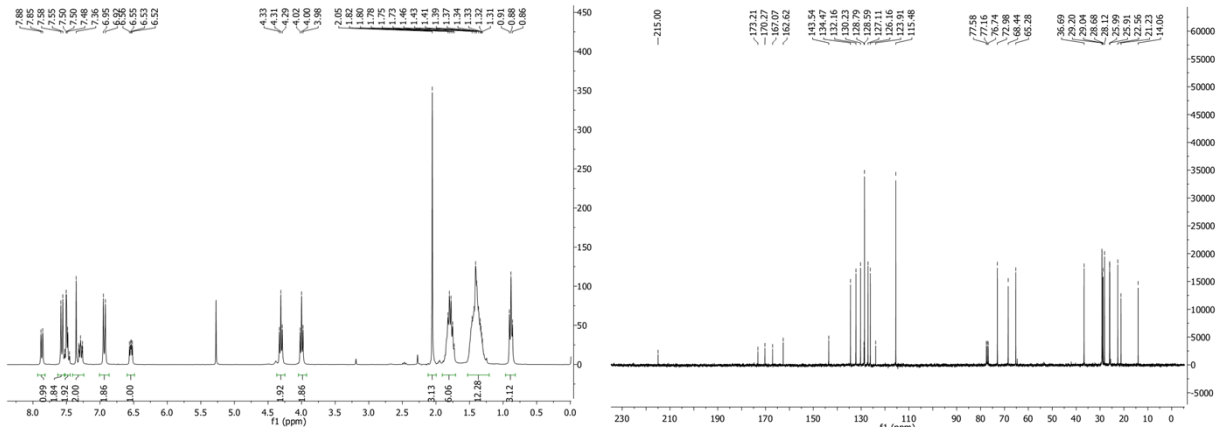

8g

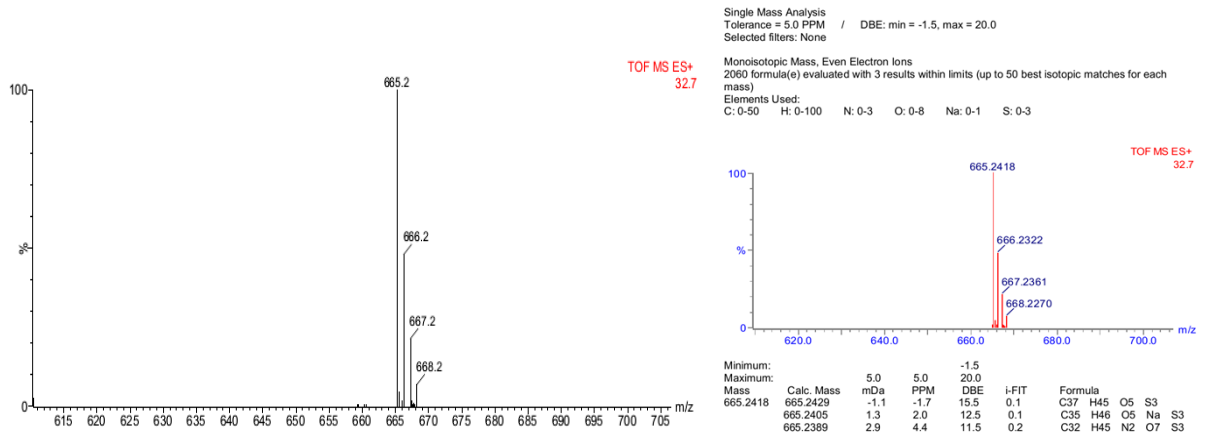





9b

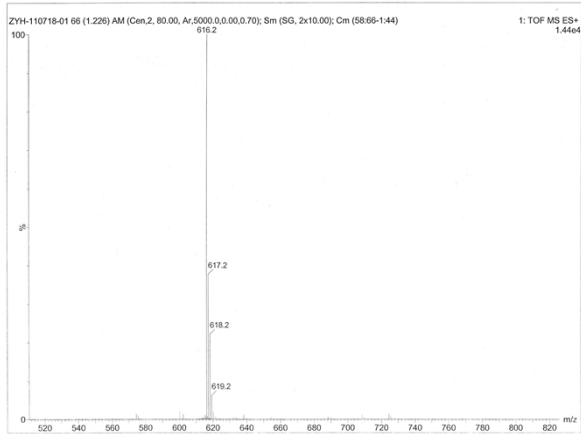

Elemental Composition Report

Page 1

**Single Mass Analysis**  
Tolerance = 5.0 PPM / DBE: min = -1.5, max = 15.0  
Selected filters: None

Monoisotopic Mass, Even Electron Ions  
1729 formula(e) evaluated with 3 results within limits (up to 50 closest results for each mass)  
Elements Used:  
C: 0-50 H: 0-100 N: 0-5 O: 0-10 S: 0-3

TOF MS ES+  
962

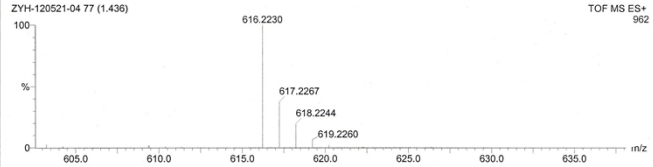

Minimum: -1.5  
Maximum: 15.0

| Mass     | Calc. Mass | mDa  | PPM  | DBE  | 1-FIT | Formula          |
|----------|------------|------|------|------|-------|------------------|
| 616.2230 | 616.2225   | 0.5  | 0.8  | 12.5 | 1.2   | C32 H42 N O5 S3  |
|          | 616.2216   | 1.4  | 2.3  | 13.5 | 9.6   | C31 H38 N O10 S  |
|          | 616.2250   | -2.0 | -3.2 | 8.5  | 2.4   | C28 H42 N O10 S2 |

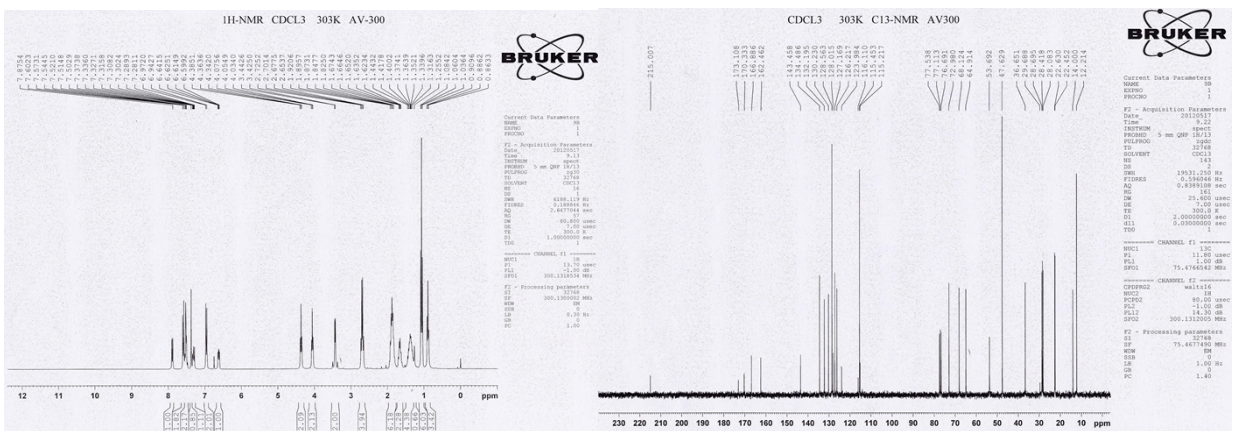

9c

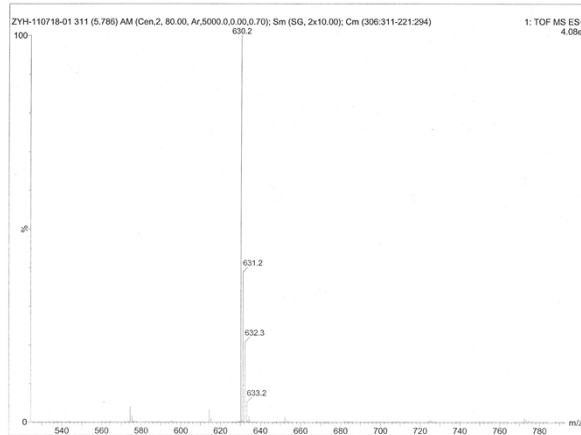

Elemental Composition Report

Page 1

**Single Mass Analysis**  
Tolerance = 5.0 PPM / DBE: min = -1.5, max = 15.0  
Selected filters: None

Monoisotopic Mass, Even Electron Ions  
1770 formula(e) evaluated with 3 results within limits (up to 50 closest results for each mass)  
Elements Used:  
C: 0-50 H: 0-100 N: 0-5 O: 0-10 S: 0-3

TOF MS ES+  
2.39e3

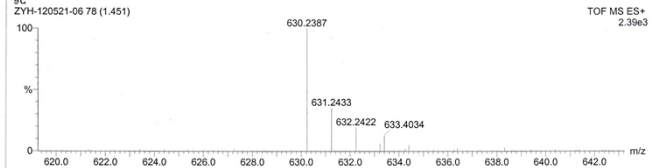

Minimum: -1.5  
Maximum: 15.0

| Mass     | Calc. Mass | mDa  | PPM  | DBE  | 1-FIT | Formula          |
|----------|------------|------|------|------|-------|------------------|
| 630.2387 | 630.2382   | 0.5  | 0.8  | 12.5 | 8.0   | C33 H44 N O5 S3  |
|          | 630.2373   | 1.4  | 2.2  | 13.5 | 23.7  | C32 H40 N O10 S  |
|          | 630.2407   | -2.0 | -3.2 | 8.5  | 3.3   | C29 H44 N O10 S2 |

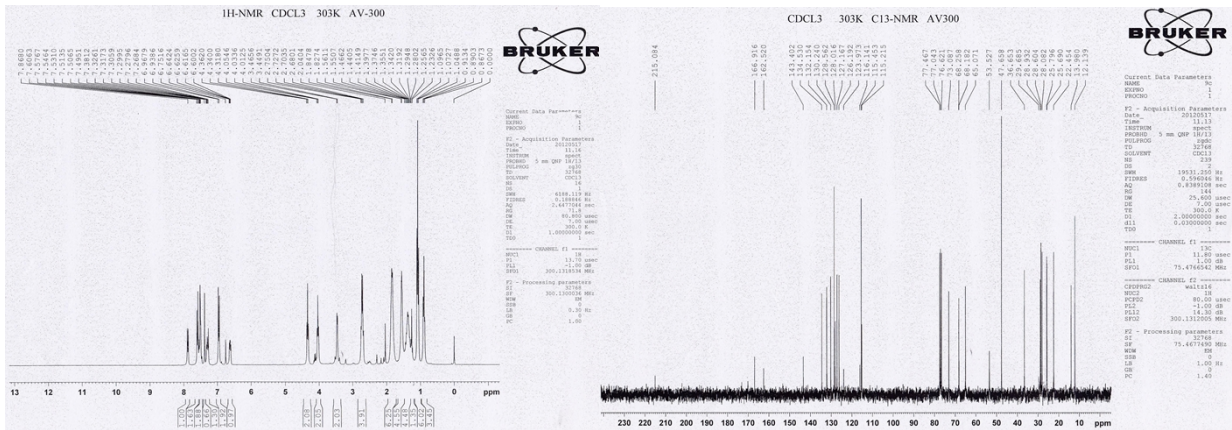

9d

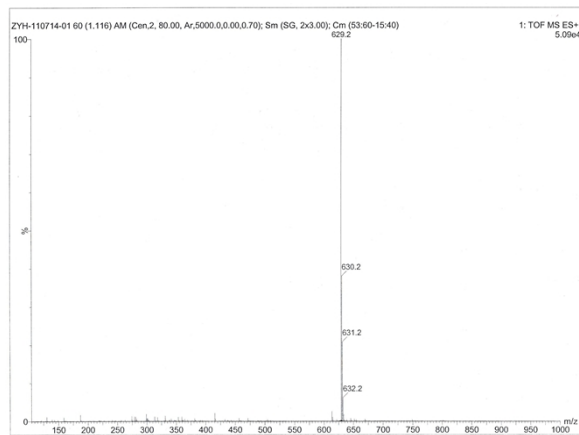

Elemental Composition Report

Page 1

Single Mass Analysis  
 Tolerance = 5.0 PPM / DBE: min = -1.5, max = 15.0  
 Selected filters: None

Monoisotopic Mass, Even Electron Ions  
 1789 formula(e) evaluated with 3 results within limits (up to 50 closest results for each mass)  
 Elements Used:  
 C: 0-50 H: 0-100 N: 0-5 O: 0-10 S: 0-3

9d  
 ZYH-120521-03 69 (1.287)

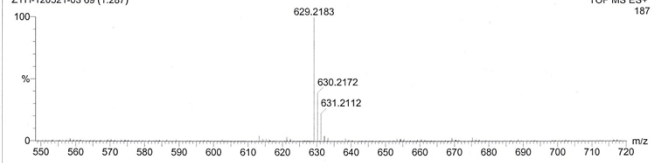

Minimum: -1.5  
 Maximum: 5.0 5.0 15.0

| Mass     | Calc. Mass | mDa  | PPM  | DBE  | i-FIT | Formula           |
|----------|------------|------|------|------|-------|-------------------|
| 629.2183 | 629.2178   | 0.5  | 0.8  | 13.5 | 0.0   | C32 H41 N2 O5 S3  |
|          | 629.2169   | 1.4  | 2.2  | 14.5 | 3.1   | C31 H37 N2 O10 S  |
|          | 629.2203   | -2.0 | -3.2 | 9.5  | 1.3   | C28 H41 N2 O10 S2 |

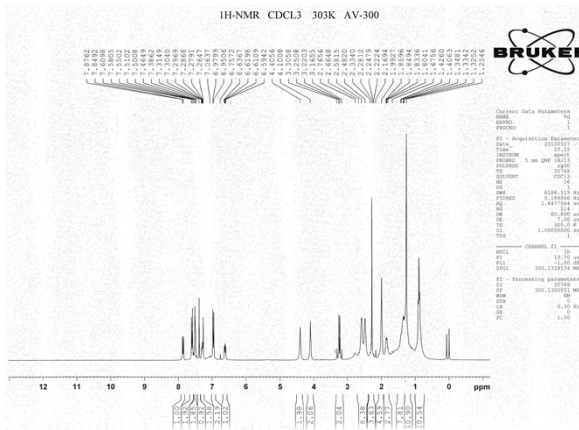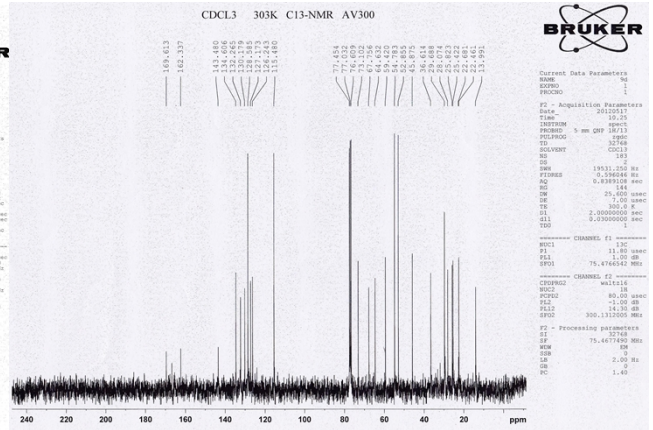

9e

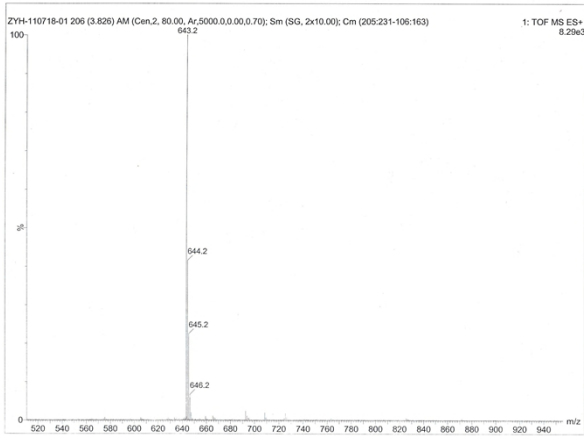

Elemental Composition Report

Page 1

Single Mass Analysis

Tolerance = 5.0 PPM / DBE: min = -1.5, max = 15.0  
Selected filters: None

Monoisotopic Mass, Even Electron Ions  
1826 formula(e) evaluated with 3 results within limits (up to 50 closest results for each mass)  
Elements Used:  
C: 0-50 H: 0-100 N: 0-5 O: 0-10 S: 0-3

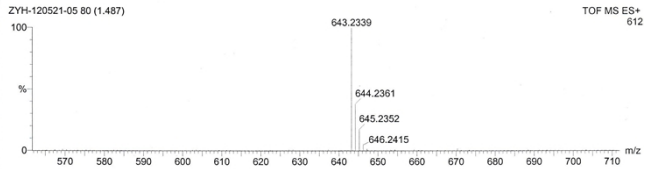

| Mass     | Calc. Mass | mDa  | PPM  | DBE  | i-FIT | Formula           |
|----------|------------|------|------|------|-------|-------------------|
| 643.2339 | 643.2334   | 0.5  | 0.8  | 13.5 | 3.8   | C33 H43 N2 O5 S3  |
|          | 643.2325   | 1.4  | 2.2  | 14.5 | 2.2   | C32 H39 N2 O10 S  |
|          | 643.2359   | -2.0 | -3.1 | 9.5  | 0.4   | C29 H43 N2 O10 S2 |

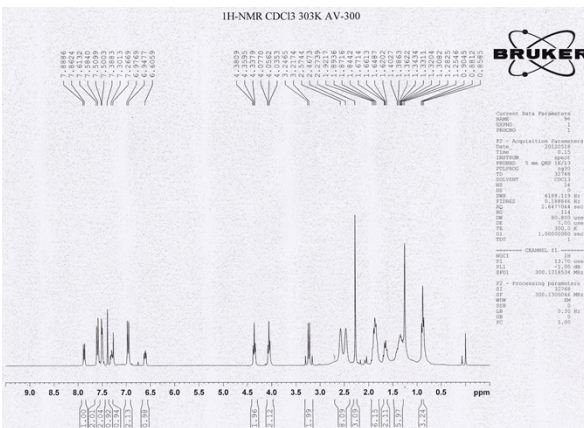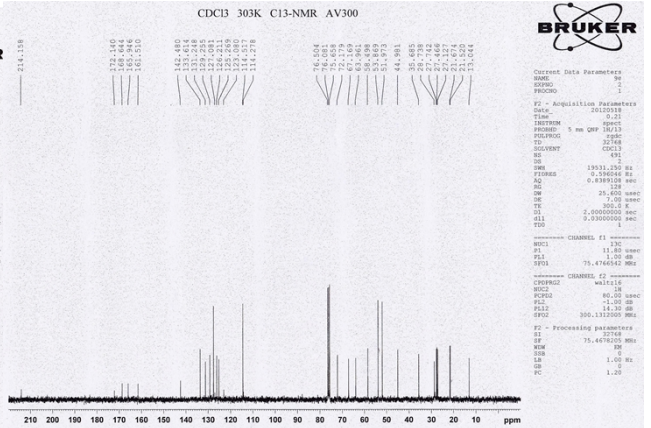

9f

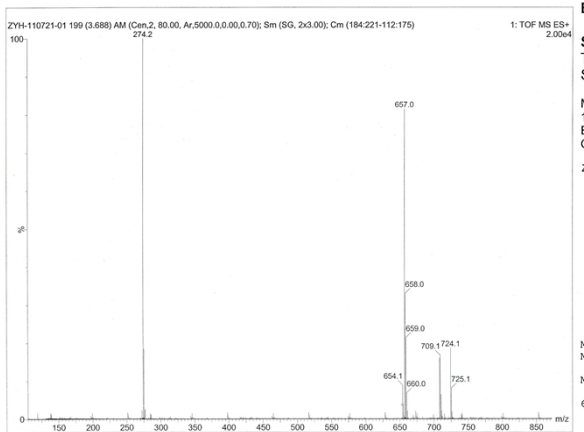

Elemental Composition Report

Page 1

Single Mass Analysis

Tolerance = 5.0 PPM / DBE: min = -1.5, max = 15.0  
Selected filters: None

Monoisotopic Mass, Even Electron Ions  
1858 formula(e) evaluated with 3 results within limits (up to 50 closest results for each mass)  
Elements Used:  
C: 0-50 H: 0-100 N: 0-5 O: 0-10 S: 0-3

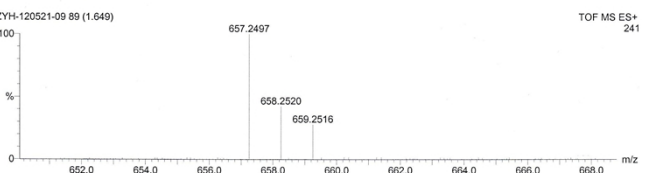

| Mass     | Calc. Mass | mDa  | PPM  | DBE  | i-FIT | Formula           |
|----------|------------|------|------|------|-------|-------------------|
| 657.2497 | 657.2491   | 0.6  | 0.9  | 13.5 | 0.9   | C34 H45 N2 O5 S3  |
|          | 657.2482   | 1.5  | 2.3  | 14.5 | 7.7   | C33 H41 N2 O10 S  |
|          | 657.2516   | -1.9 | -2.9 | 9.5  | 4.4   | C30 H45 N2 O10 S2 |

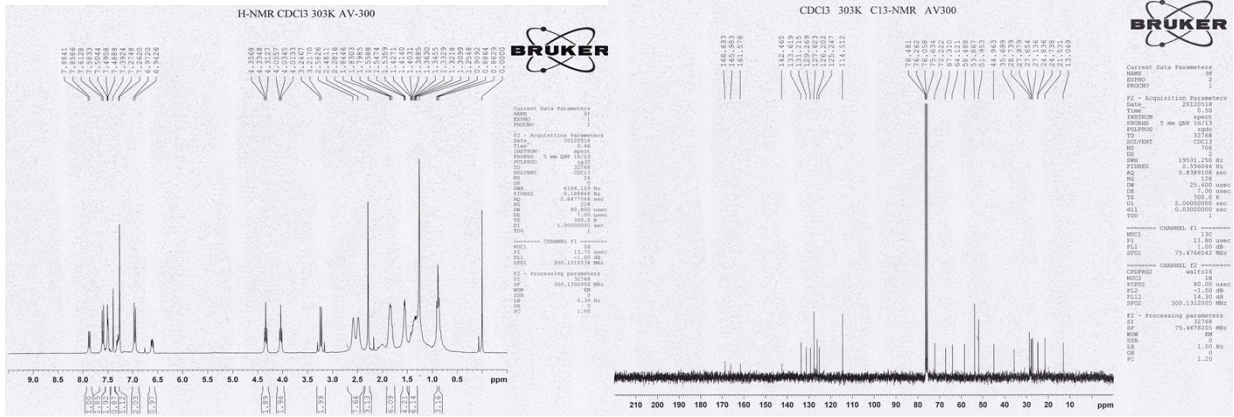

Supplement: c4ob00830h1.pdf [file c4ob00830h1.pdf]
